# Supplementary material for: Regulating the cytoprotective response in cancer cells using simultaneous inhibition of Hsp90 and Hsp70
Source: Royal Society of Chemistry journal article supplement (doi:10.1039/c4ob02531h), 2014-12-09
Supplement: c4ob02531h1.pdf [file c4ob02531h1.pdf]

# Supplementary material for: Regulating the cytoprotective response in cancer cells using simultaneous inhibition of Hsp90 and Hsp70

Y. Wang,<sup>a</sup> and S. R. McAlpine <sup>\*a</sup>

## SUPPLEMENTARY FIGURES

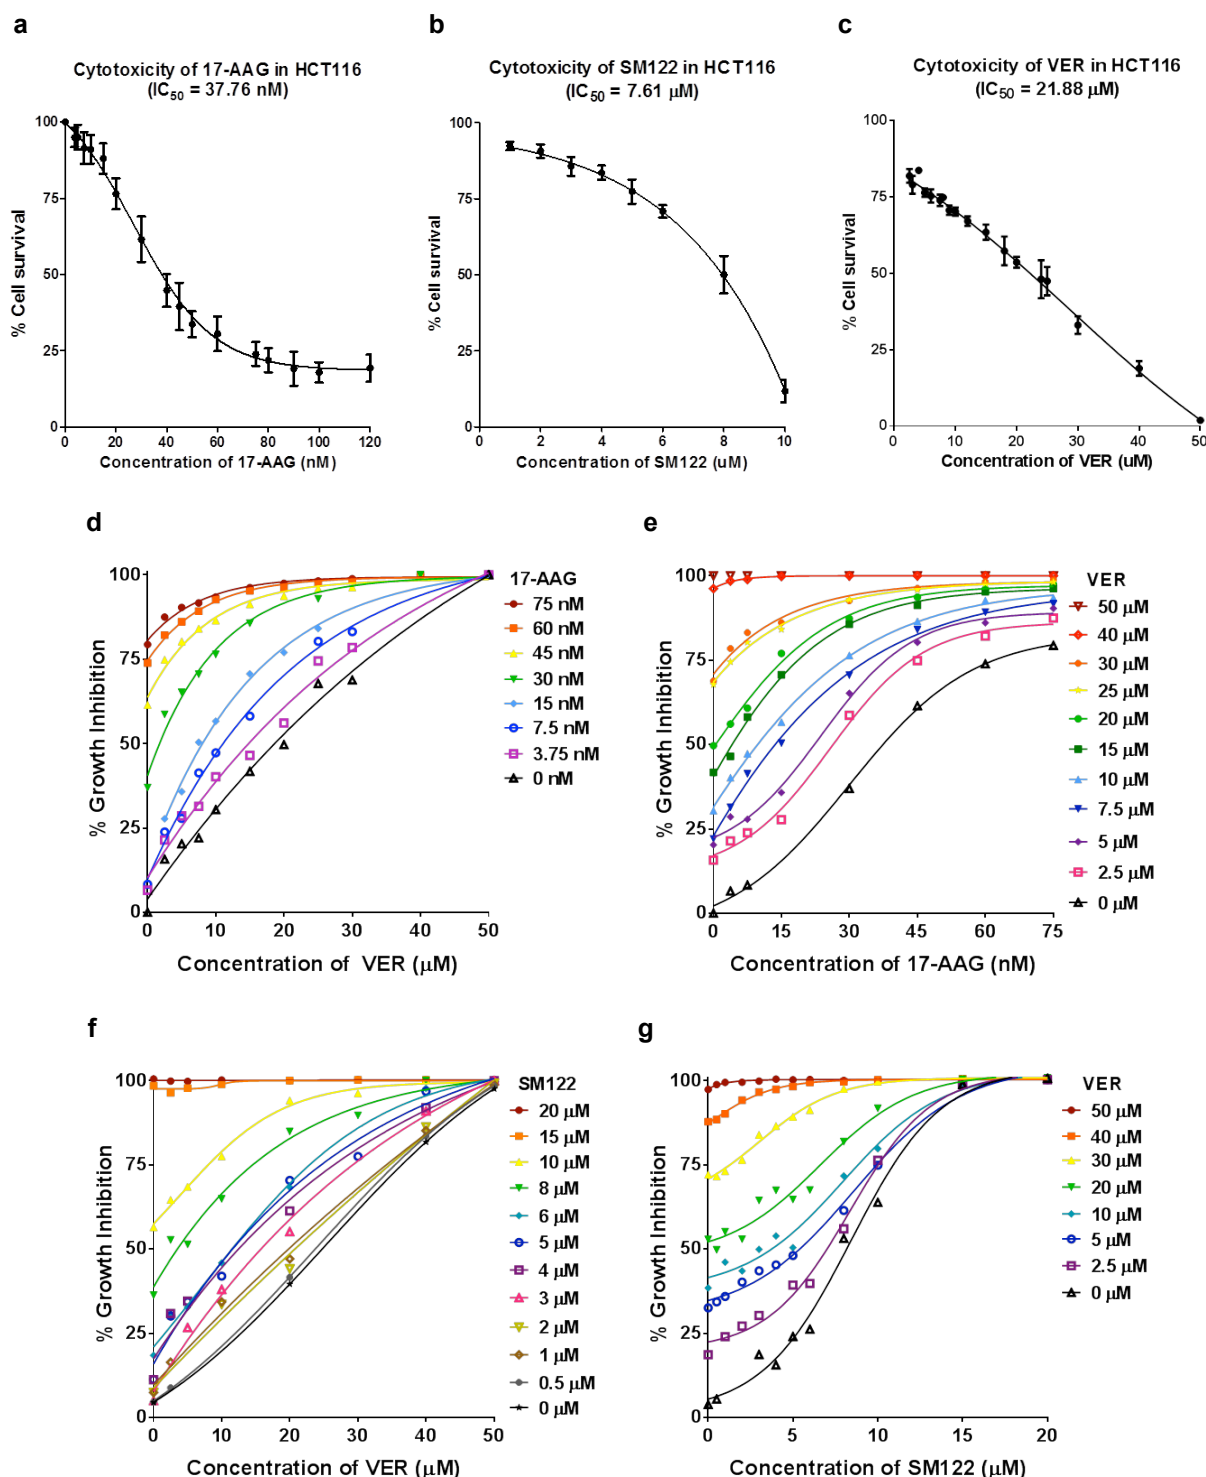

**Supplementary Figure 1.** Cytotoxicity of mono- and dual HSP inhibition in HCT116 cells. (a-c)  $IC_{50}$  curves of 17-AAG, SM122, and VER, respectively, in 72 h-treatment of HCT116 cells. (d-g) Isoeffect curves for isobologram analysis in **Figure 2**. All values in a-c are average  $\pm$  s.e.m. from at least three independent experiments.

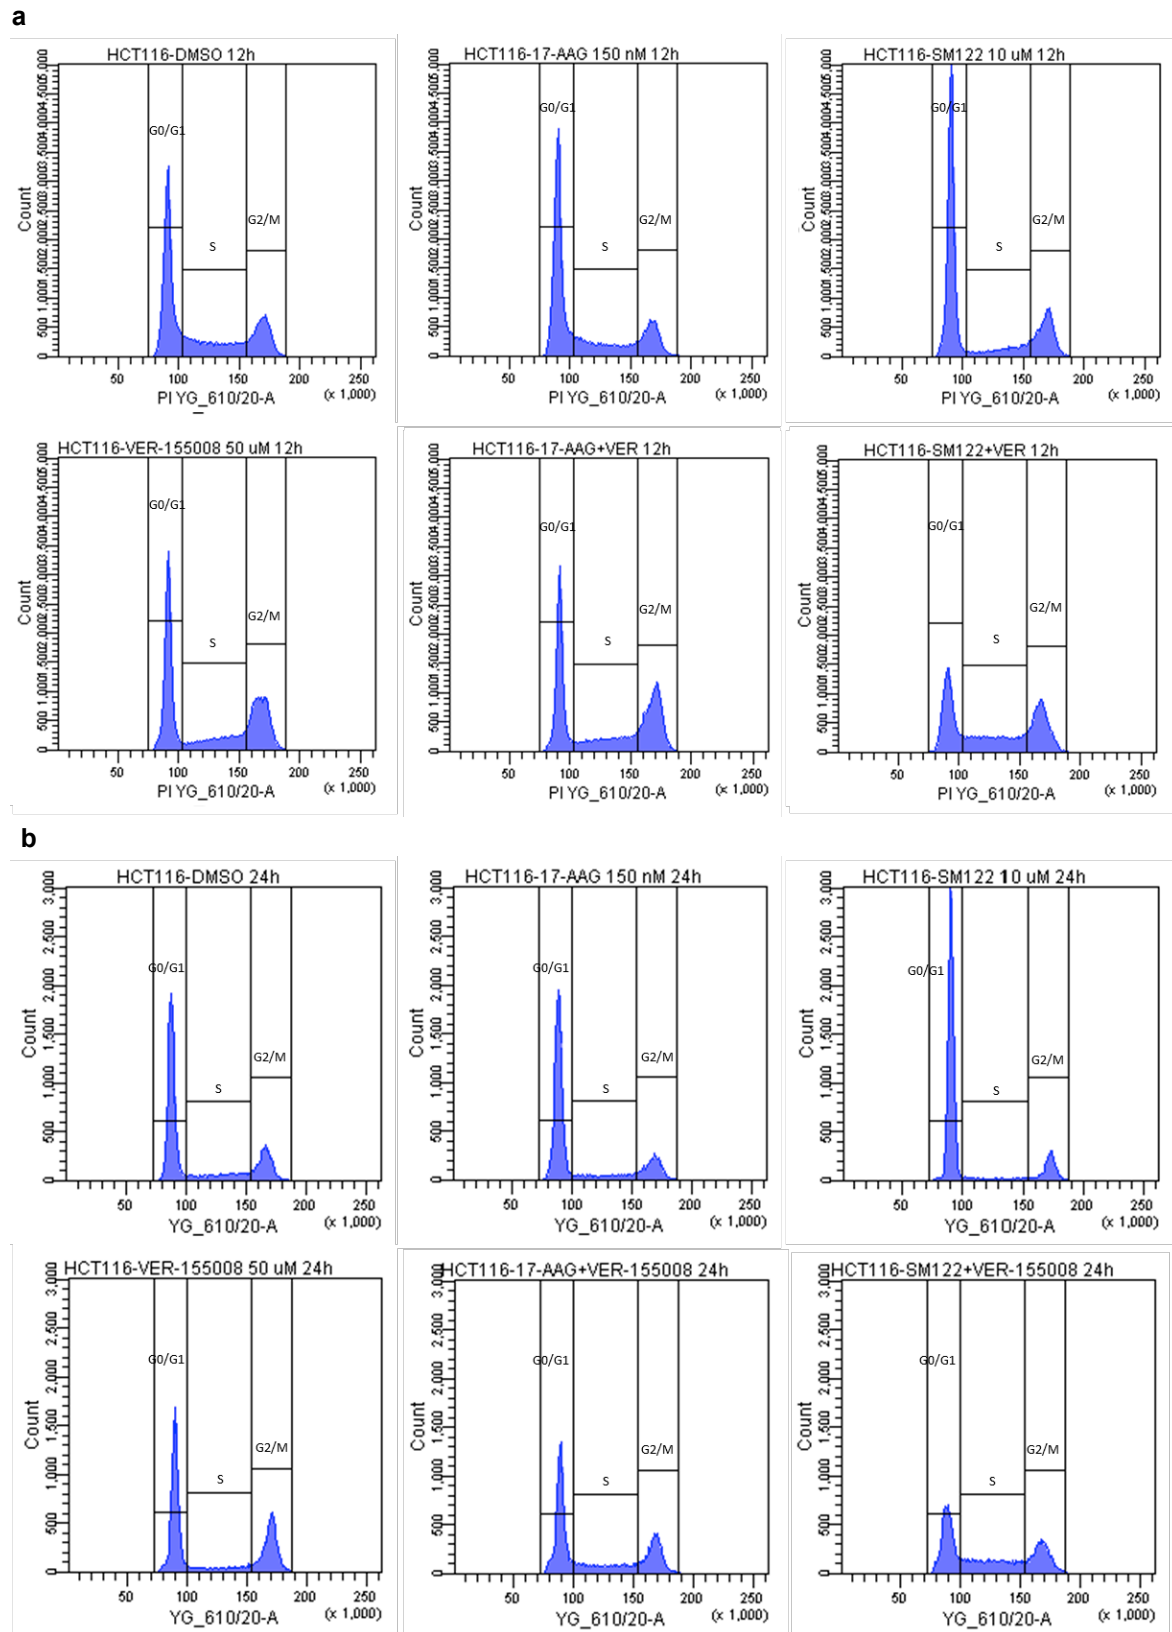

**Supplementary Figure 2. Raw data of cell-cycle analysis.** (a, b) Cell cycle distribution in HCT116 cells treated with indicated inhibitors for 12 or 24 h were detected by flow cytometry using PI stain. These graphs are representative for three individual experiments that yielded similar results.

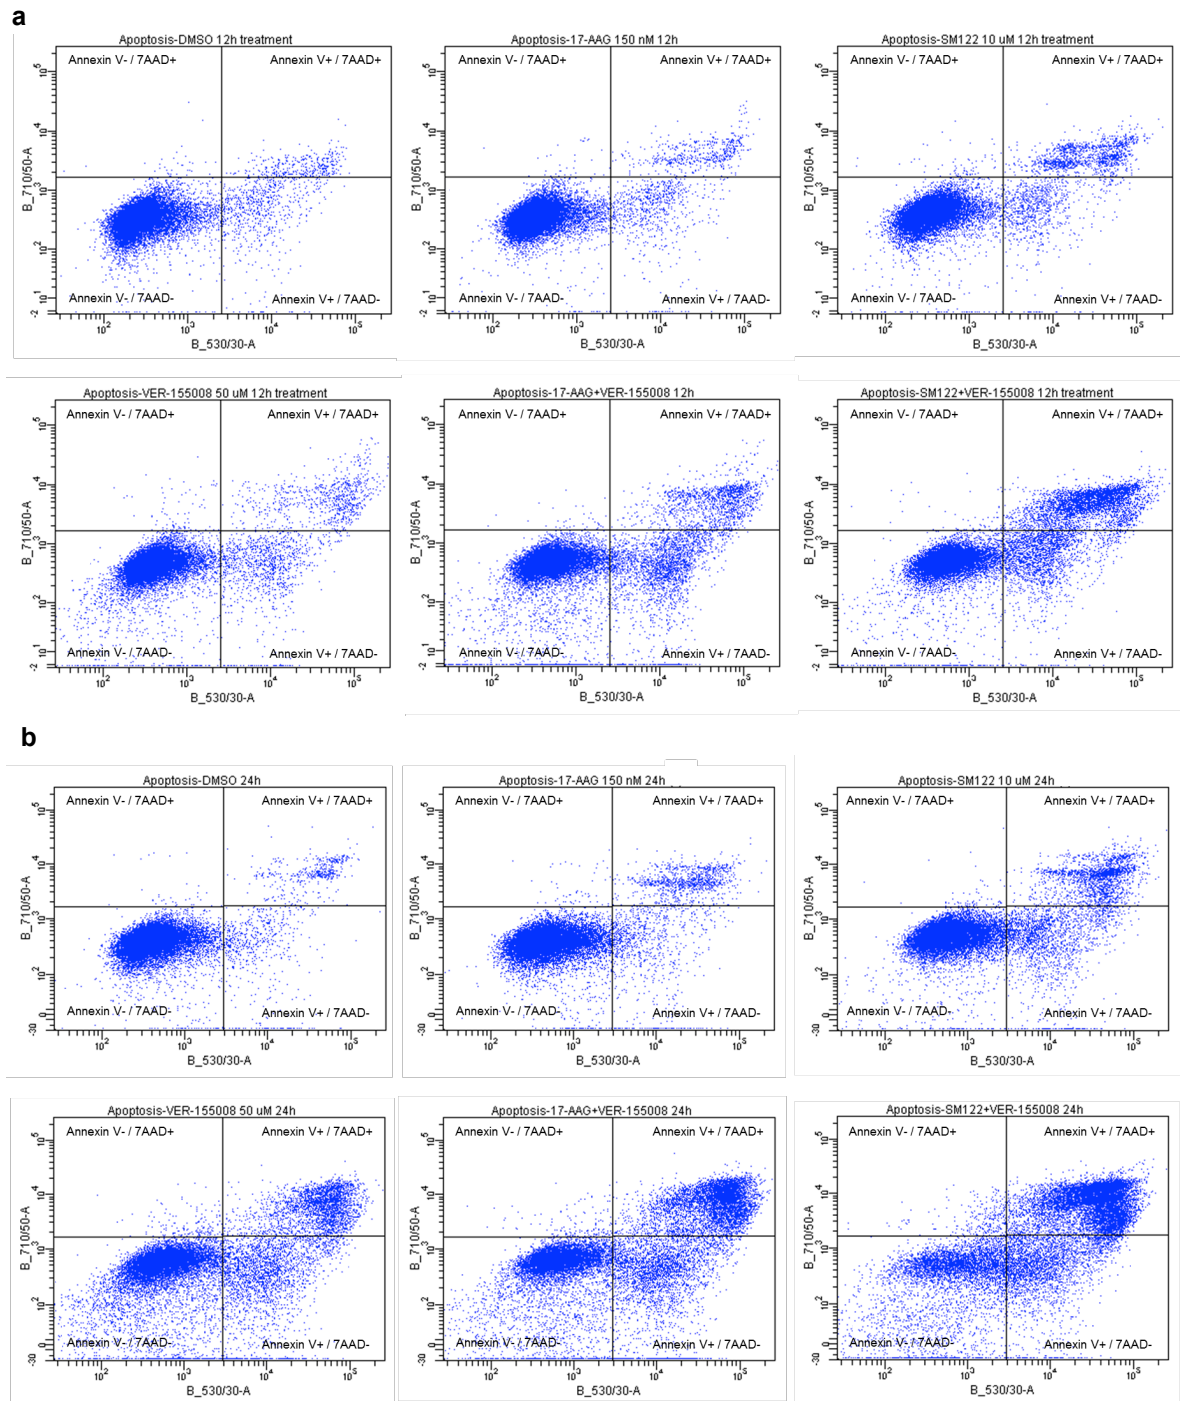

**Supplementary Figure 3. Raw data of apoptosis analysis in HCT116. (a, b)** The apoptosis induction in HCT116 cells treated with indicated inhibitors for 12 or 24 h was detected. Treated cells were stained with 7AAD/Annexin V-FITC and analysed by flow cytometry. All experiments were performed in triplicate, and representative results are shown.
